# Supplementary material
Source: PubMed Central journal article supplement (PMC4256495)

Raw file: 20130528\_EXQ4\_MaZe\_SA\_P1\_11  
 Scan: 36636 Method: FTMS; HCD Score: 122.52 m/z: 350.55 Gene names: Yipf5

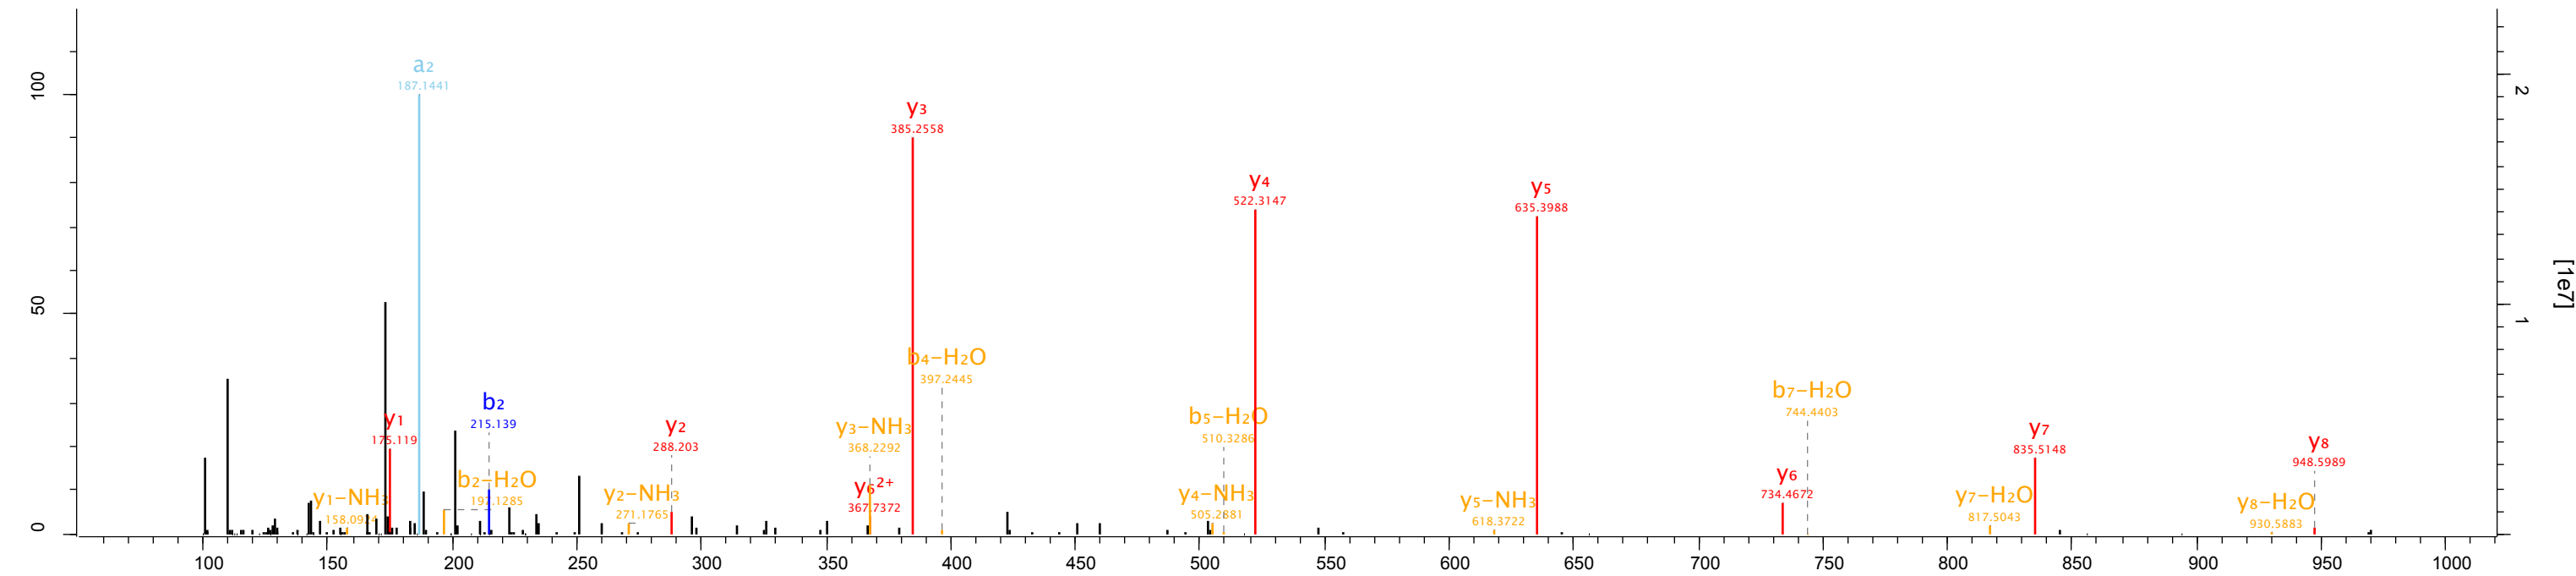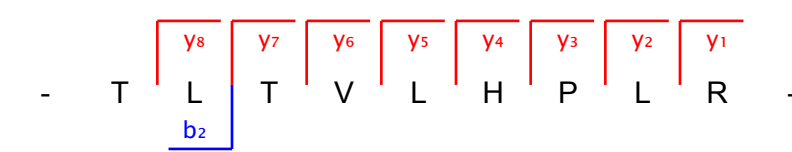

Raw file  
20130529\_EXQ4\_MaZe\_SA\_P2\_3

Scan 8484 Method FTMS; HCD Score 53.3 m/z 645.64 Gene names Ptprz1

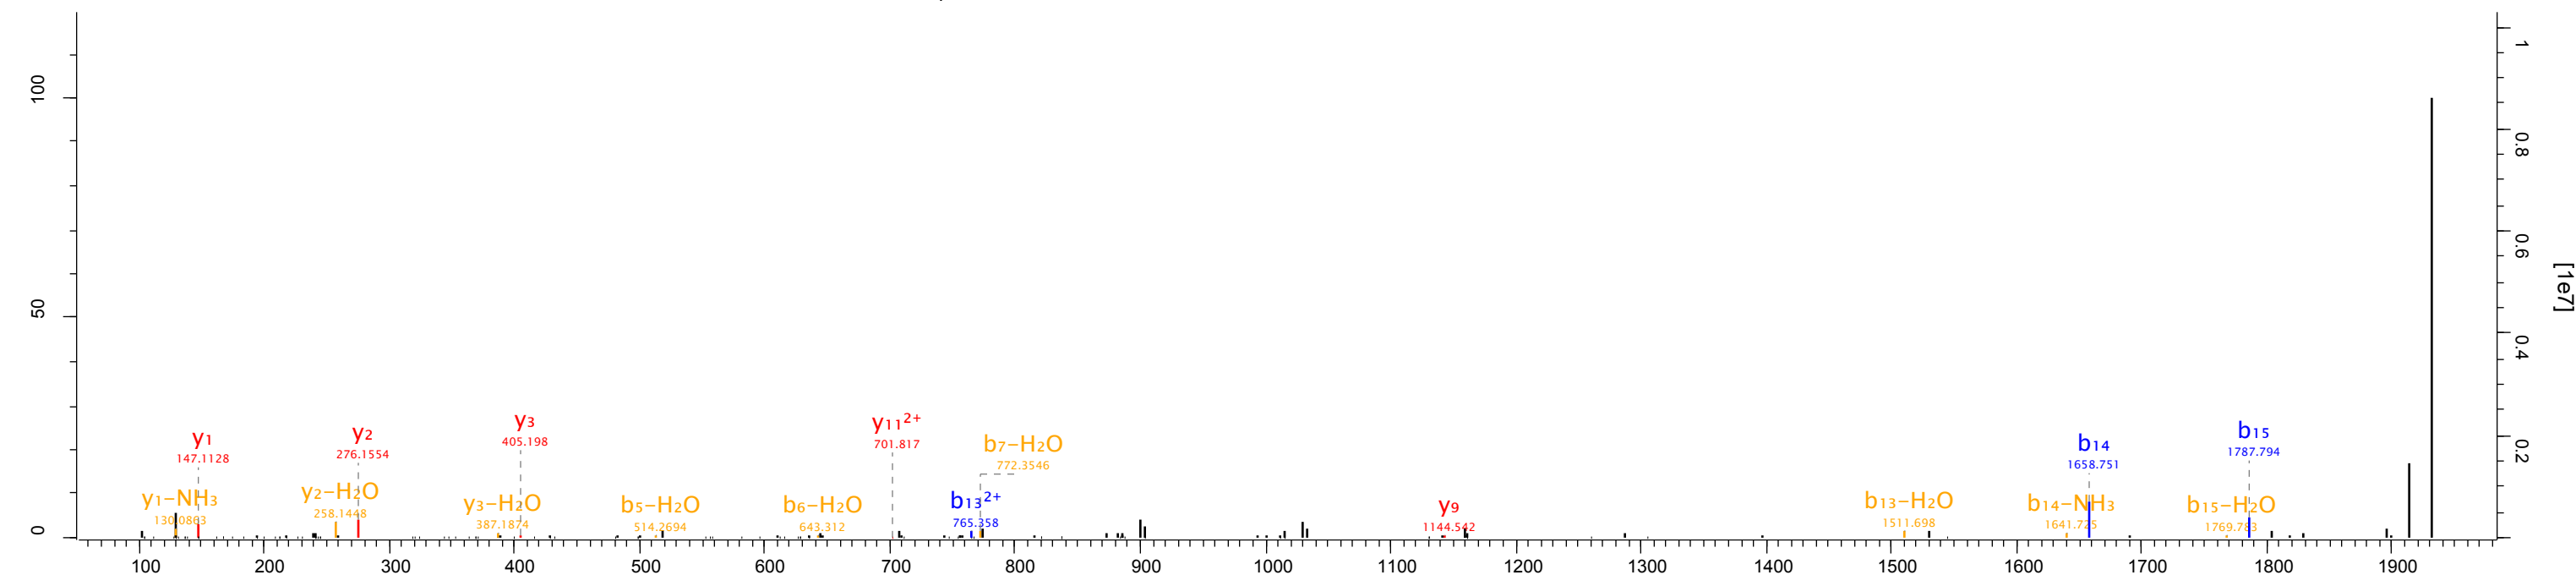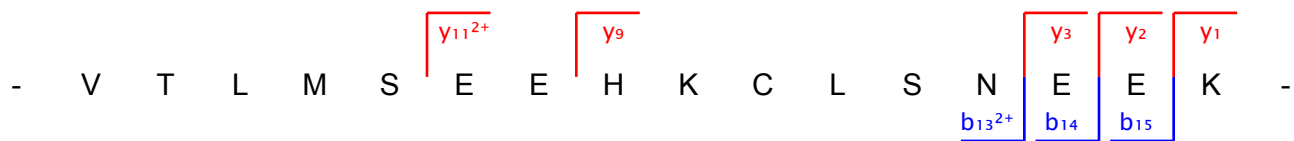

Raw file: 20130529\_EXQ4\_MaZe\_SA\_P2\_4  
 Scan: 8698 Method: FTMS; HCD Score: 148.18 m/z: 702.34 Gene names: Rassf2

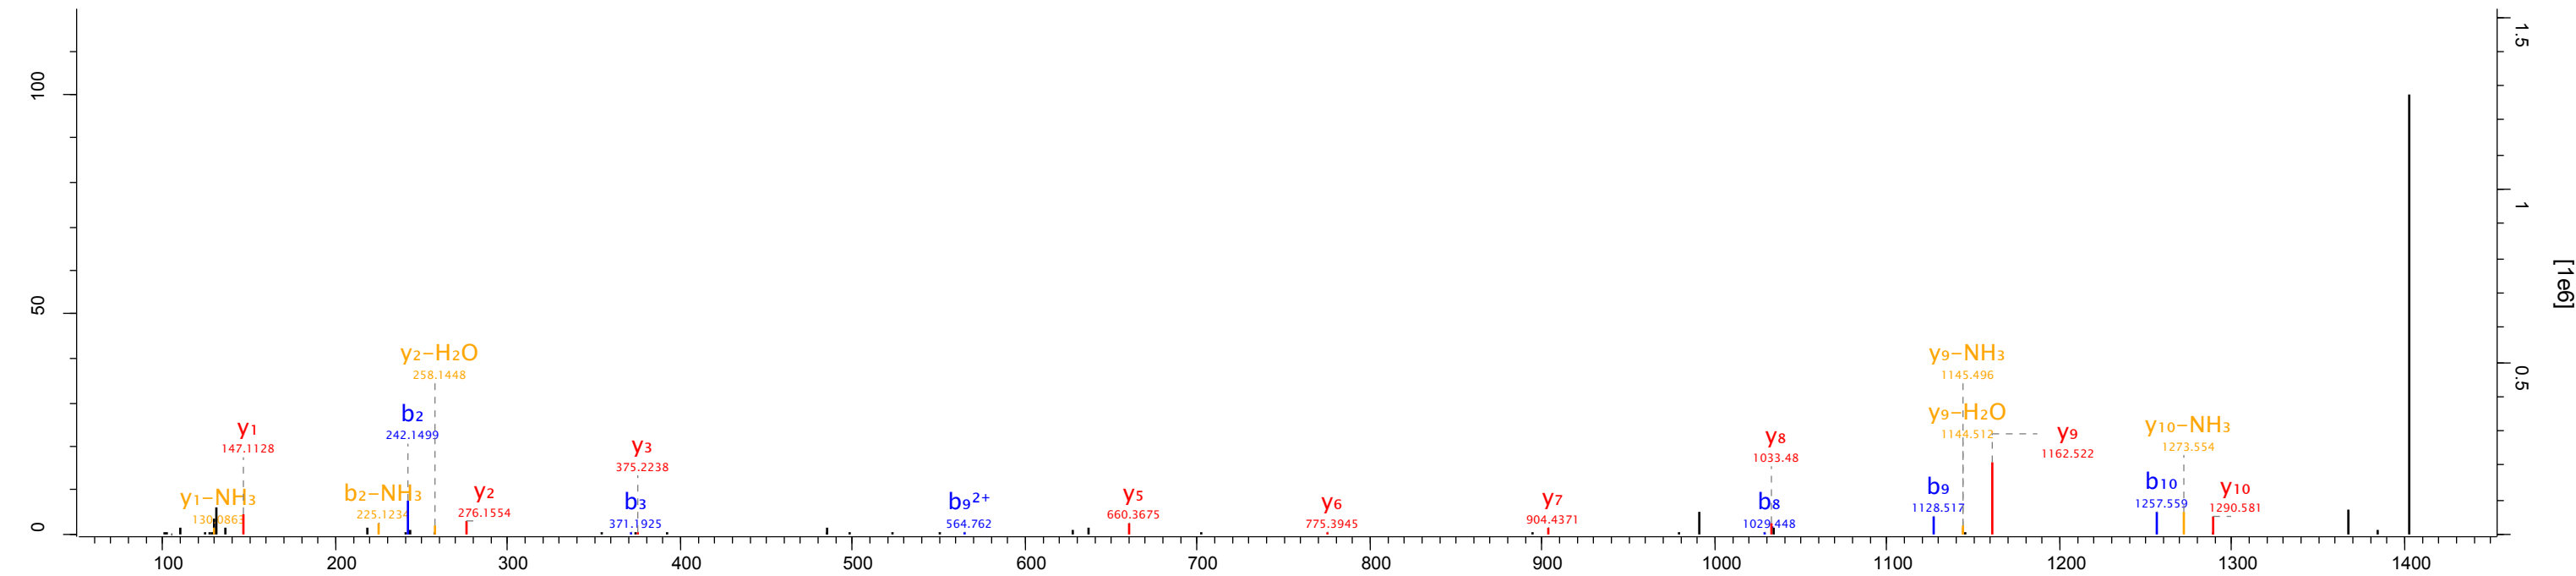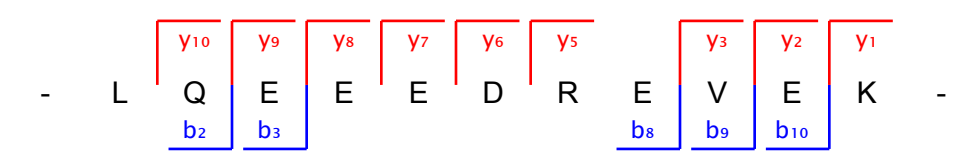

Raw file: 20130529\_EXQ4\_MaZe\_SA\_P2\_4  
 Scan: 47218 Method: FTMS; HCD Score: 122.63 m/z: 844.4 Gene names: Pigm

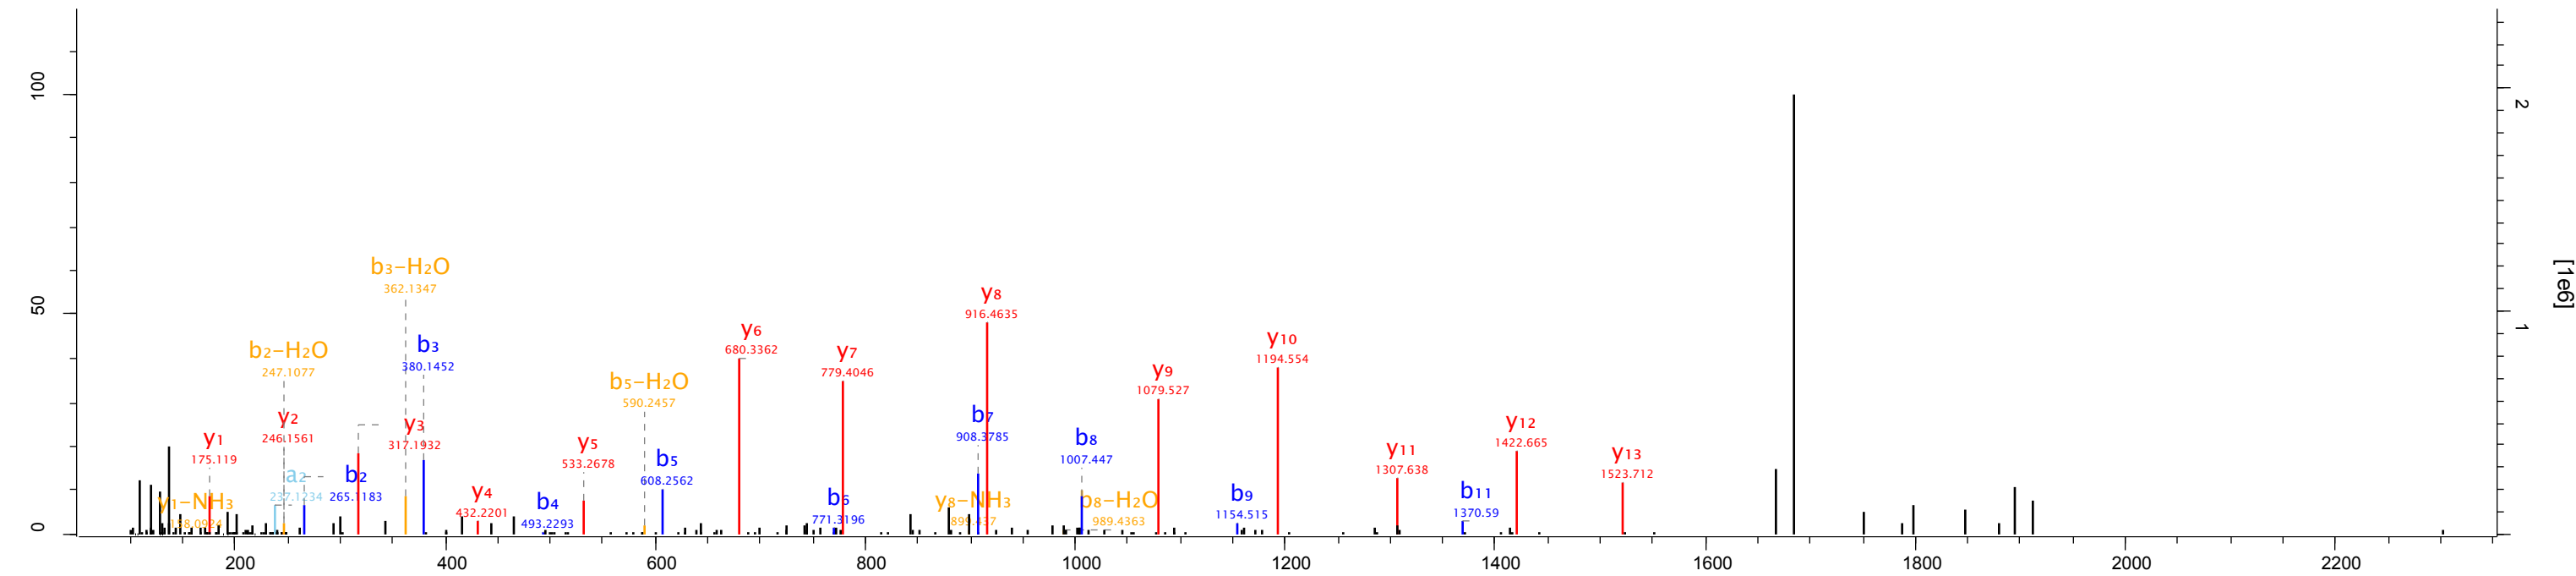

Y - T D I D Y H V F T D A A R -

Fragmentation mapping (b and y ions):

- b<sub>2</sub> (blue) covers T
- b<sub>3</sub> (blue) covers D
- b<sub>4</sub> (blue) covers I
- b<sub>5</sub> (blue) covers D
- b<sub>6</sub> (blue) covers Y
- b<sub>7</sub> (blue) covers H
- b<sub>8</sub> (blue) covers V
- b<sub>9</sub> (blue) covers F
- b<sub>11</sub> (blue) covers T
- y<sub>1</sub> (red) covers T
- y<sub>2</sub> (red) covers A
- y<sub>3</sub> (red) covers A
- y<sub>4</sub> (red) covers R
- y<sub>5</sub> (red) covers T
- y<sub>6</sub> (red) covers F
- y<sub>7</sub> (red) covers V
- y<sub>8</sub> (red) covers H
- y<sub>9</sub> (red) covers Y
- y<sub>10</sub> (red) covers D
- y<sub>11</sub> (red) covers I
- y<sub>12</sub> (red) covers D
- y<sub>13</sub> (red) covers T

Raw file  
20130529\_EXQ4\_MaZe\_SA\_P2\_8

Scan 19281 Method FTMS; HCD Score 117.03 m/z 821.4 Gene names Enah

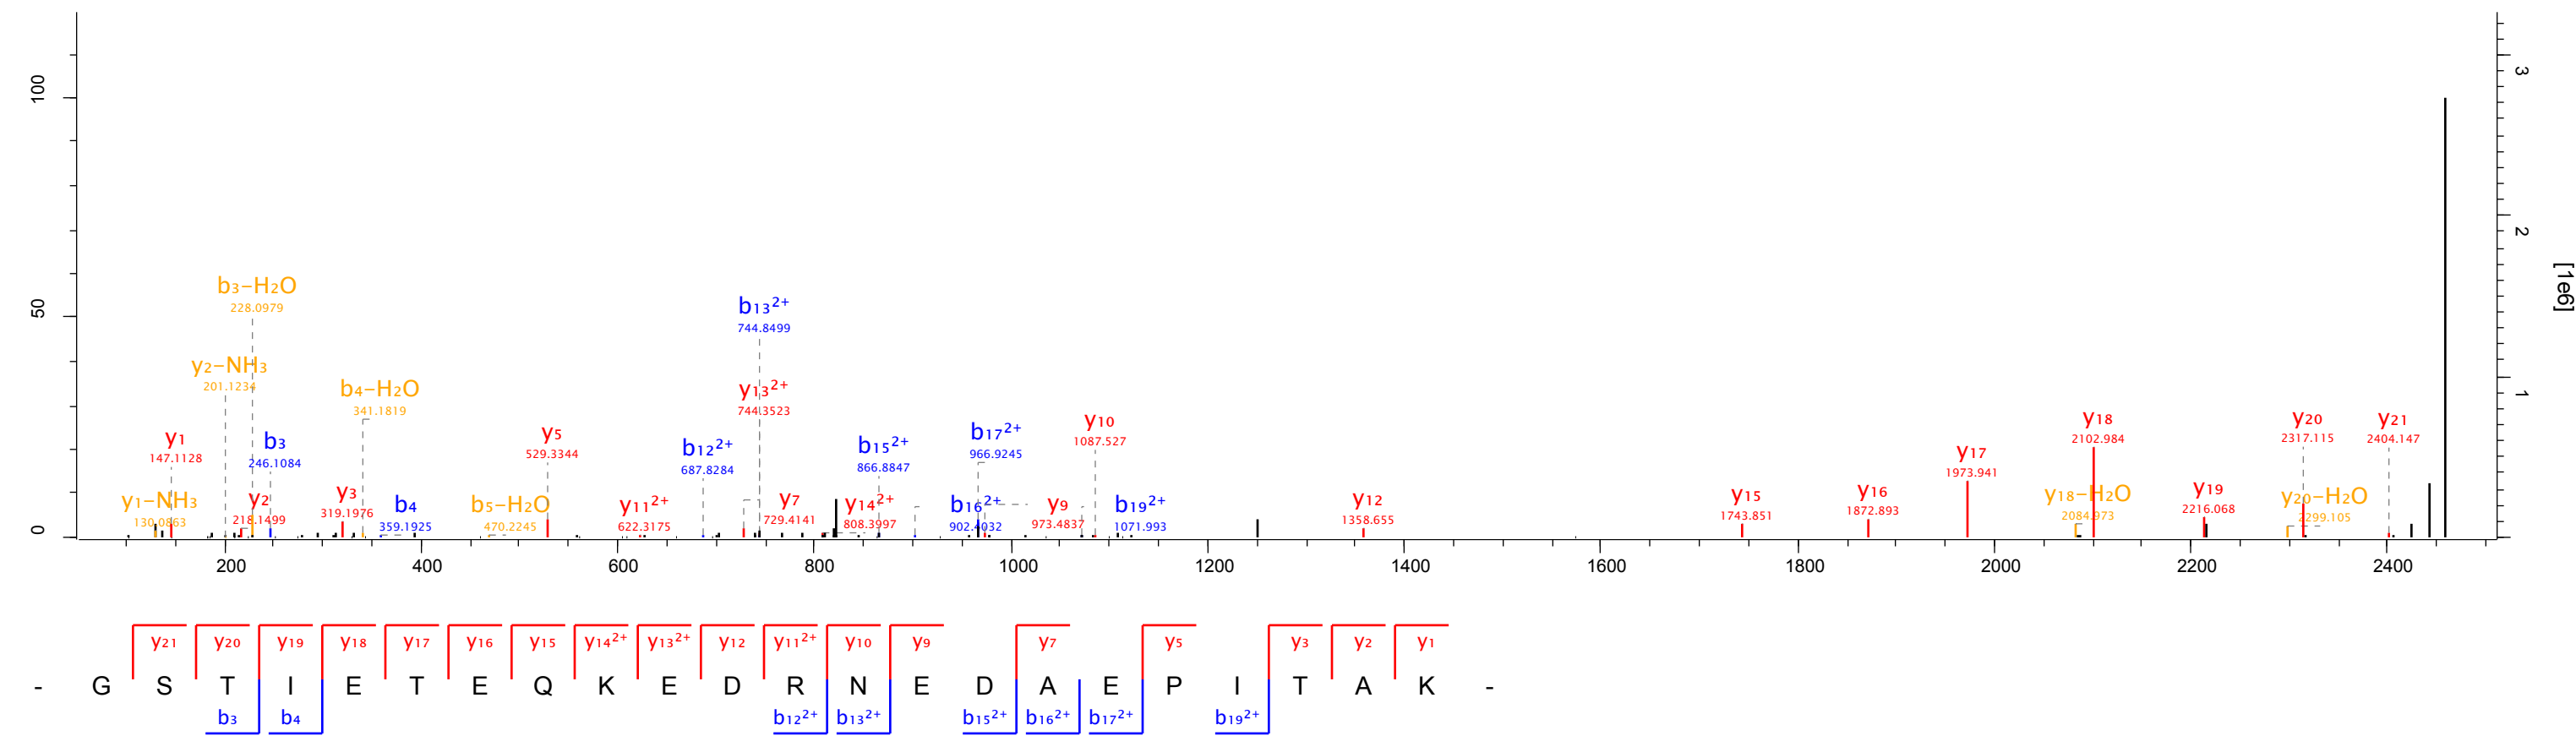

Raw file 20130529\_EXQ4\_MaZe\_SA\_P2\_11 Scan 45630 Method FTMS; HCD Score 213.55 m/z 890.49 Gene names Slc35a3

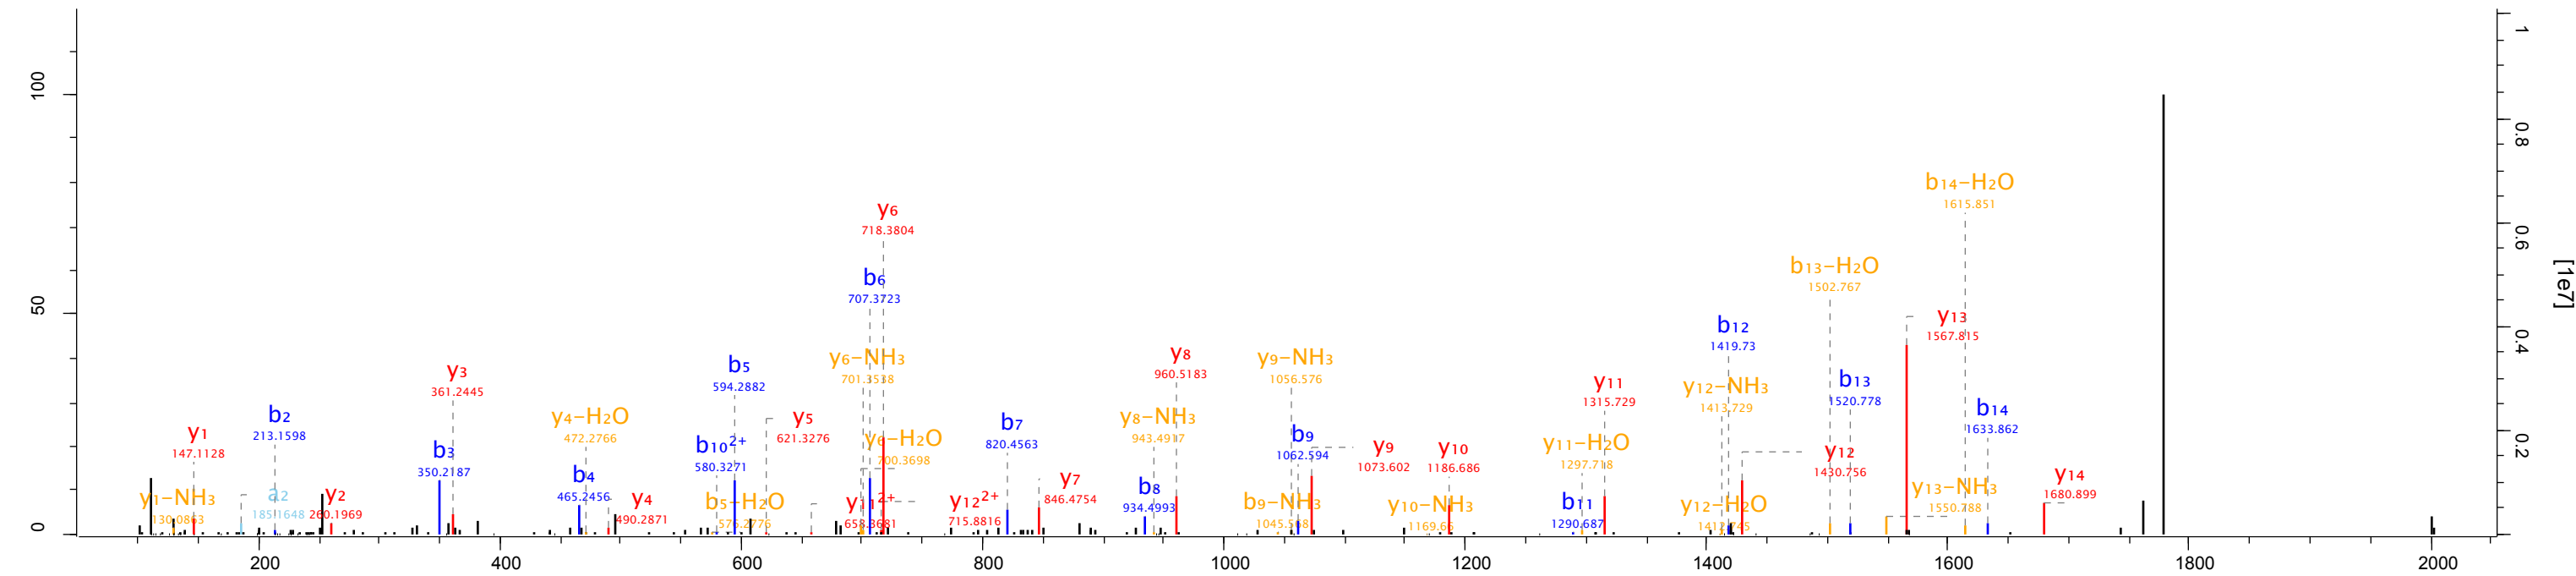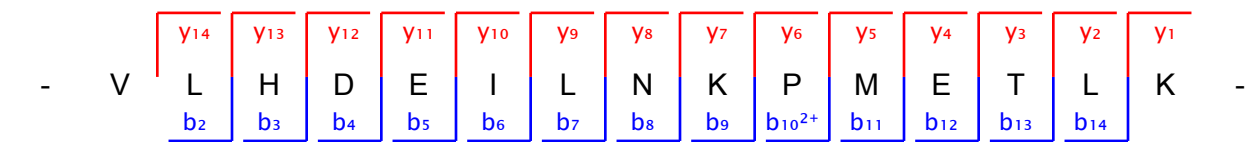

Raw file 20130531\_EXQ4\_MaZe\_SA\_P4\_6 Scan 10234 Method FTMS; HCD Score 54.4 m/z 454.92 Gene names Gpr137

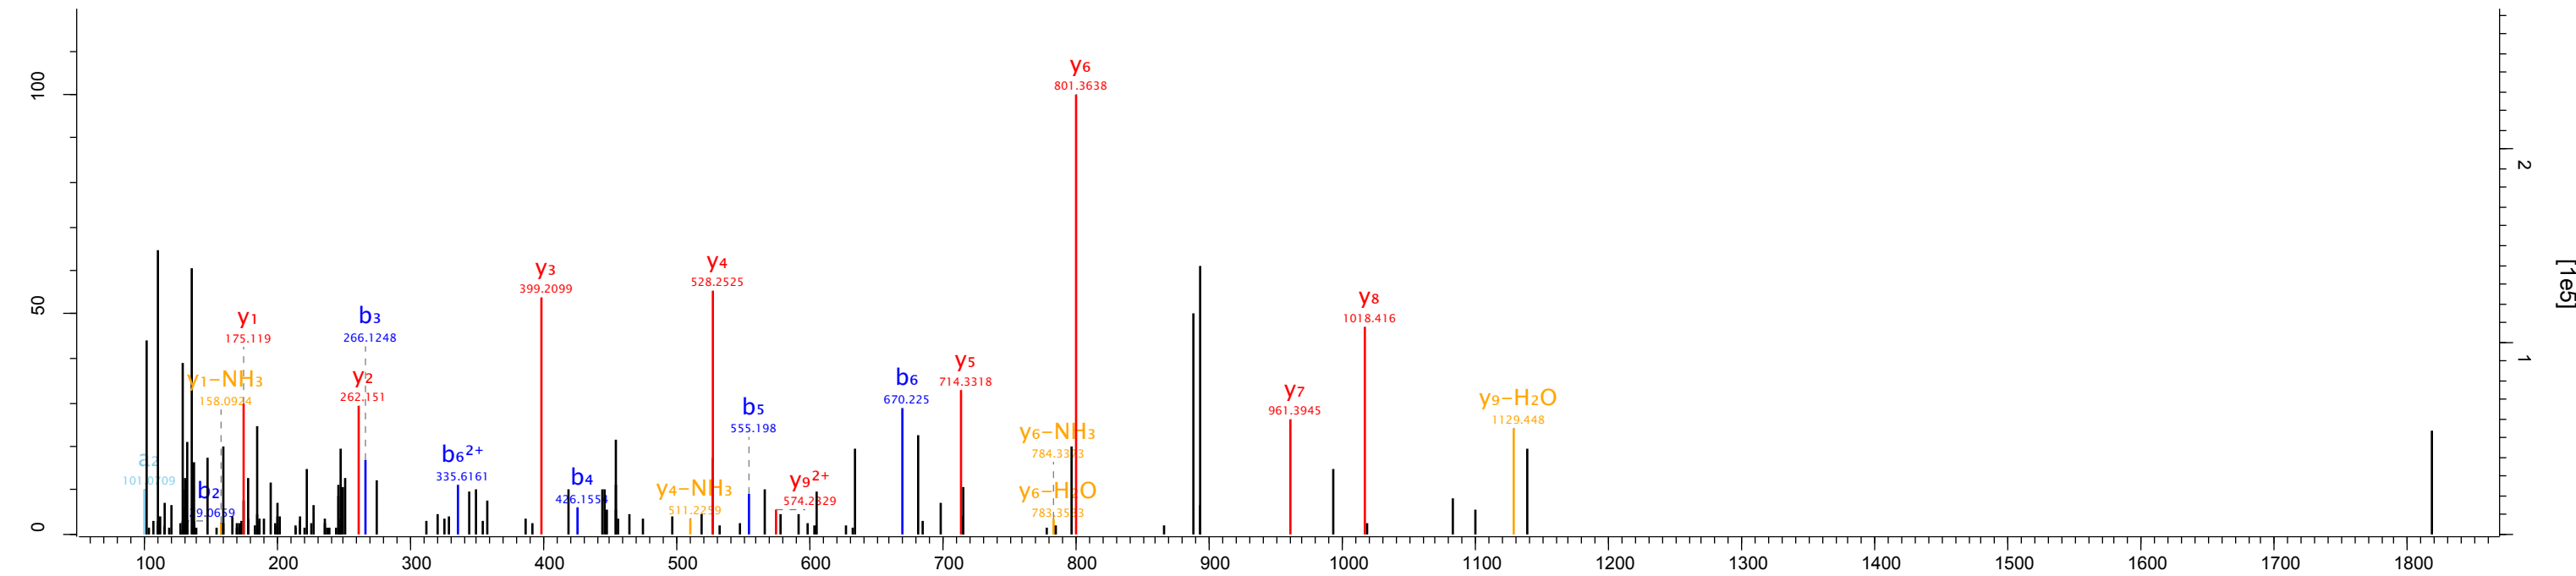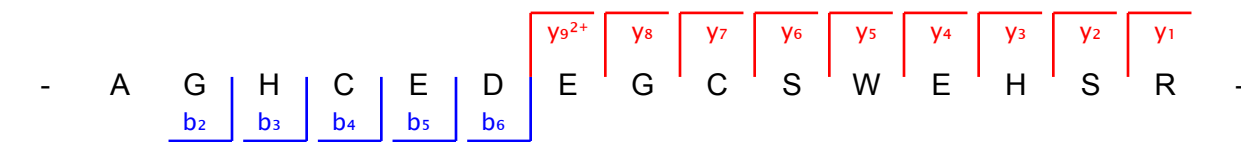

Raw file: 20130531\_EXQ4\_MaZe\_SA\_P4\_6  
 Scan: 49857 Method: FTMS; HCD Score: 50.9 m/z: 442 Gene names: Ppp1r9a

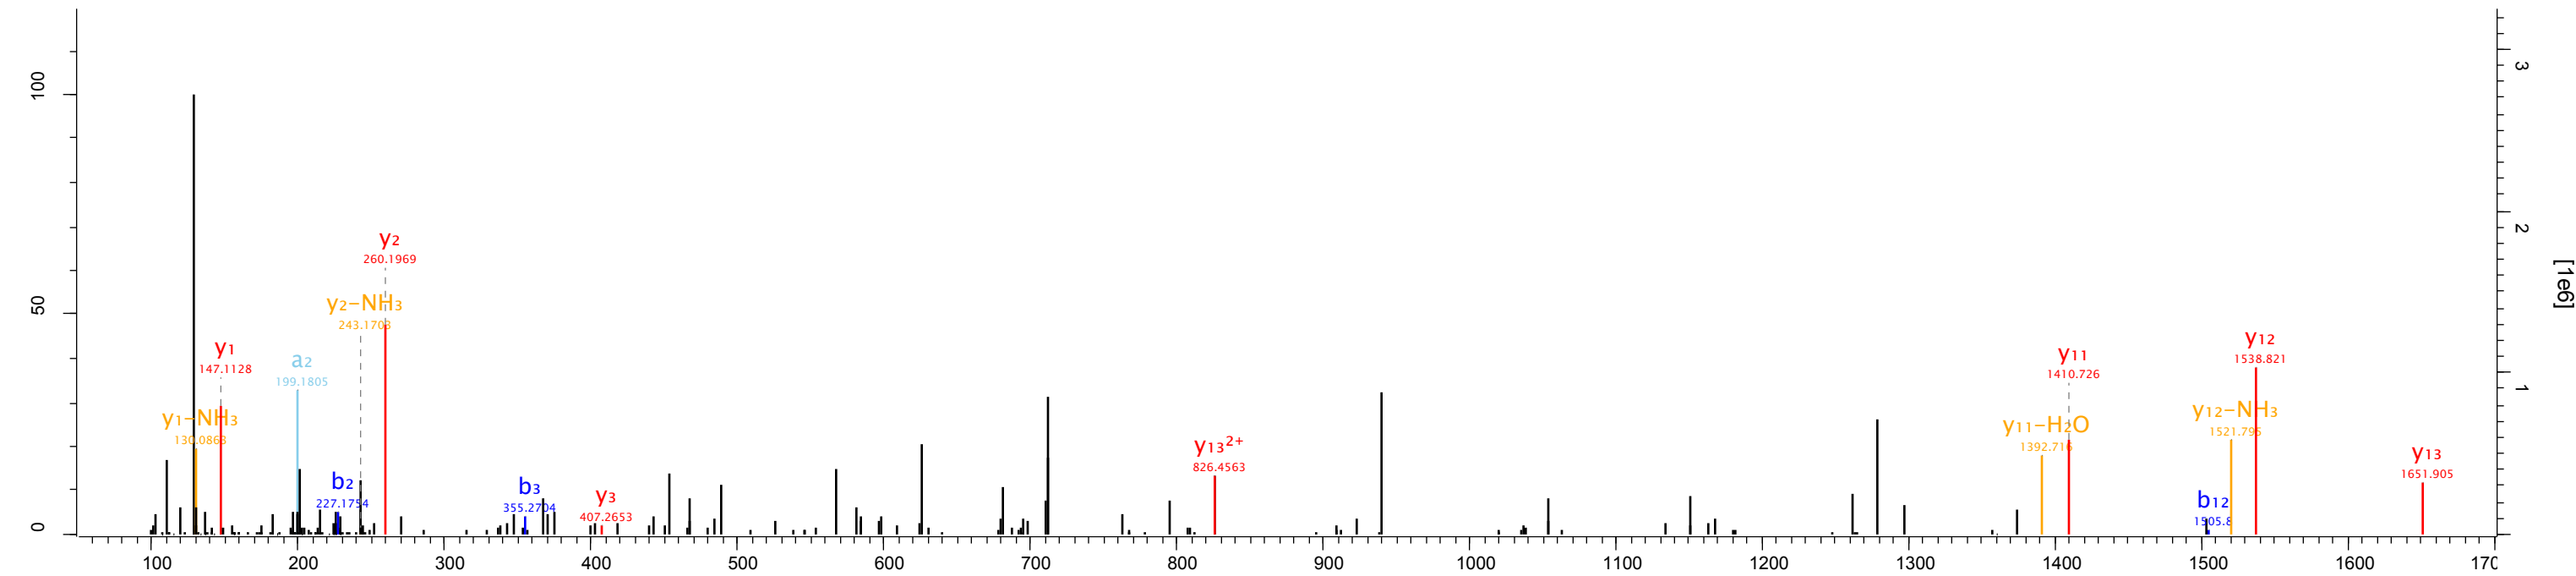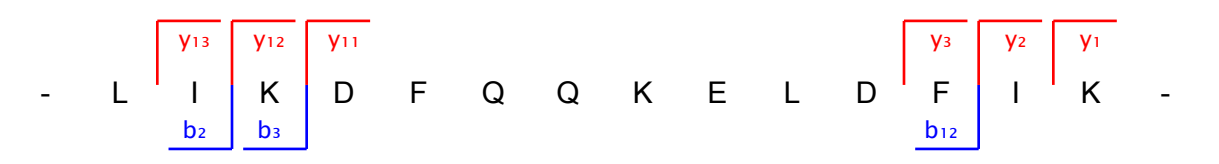



Raw file 20130531\_EXQ4\_MaZe\_SA\_P4\_11 Scan 10202 Method FTMS; HCD Score 183.03 m/z 480.59 Gene names Ninj1

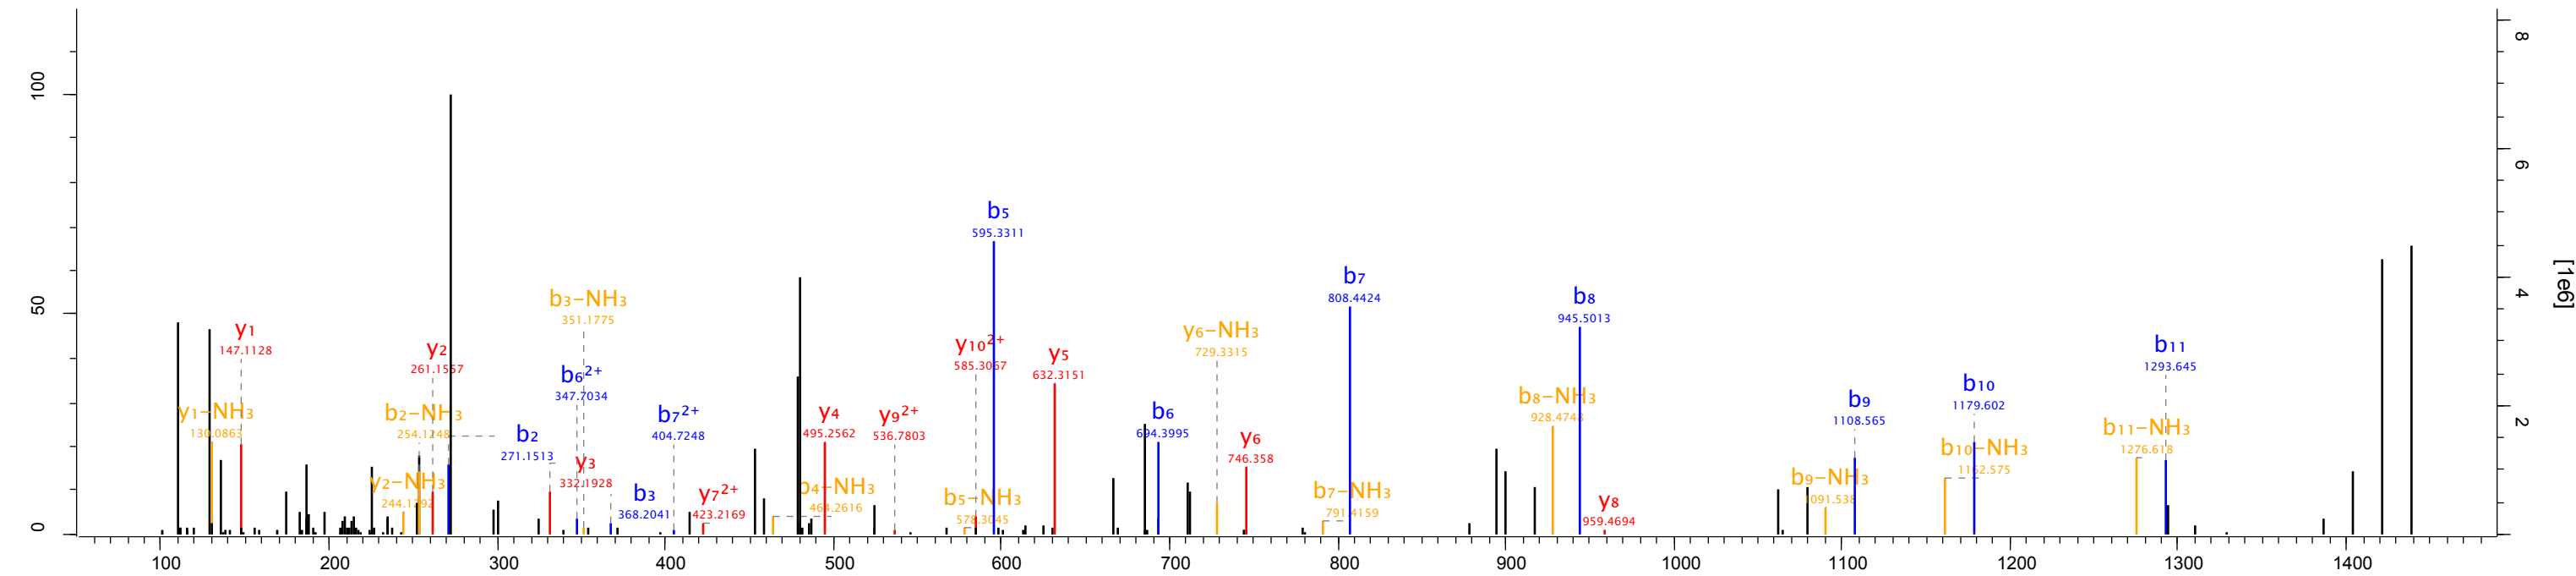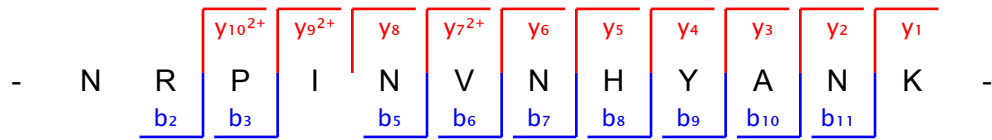

Raw file 20130531\_EXQ4\_MaZe\_SA\_P4\_11 Scan 75396 Method FTMS; HCD Score 182.82 m/z 946.5 Gene names Atp6v0c

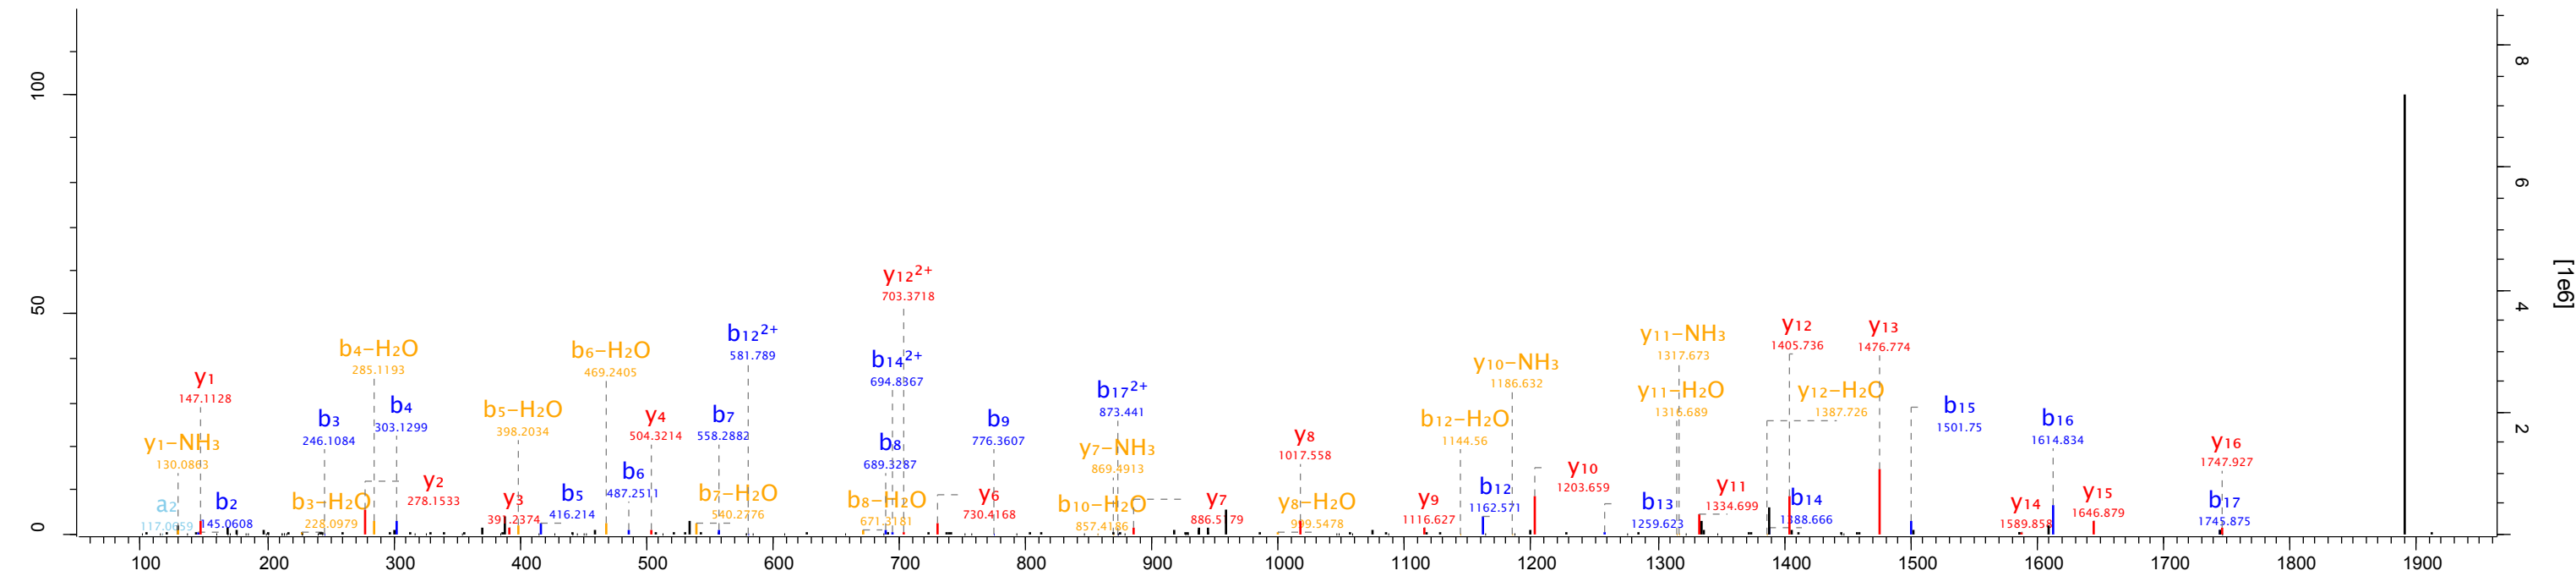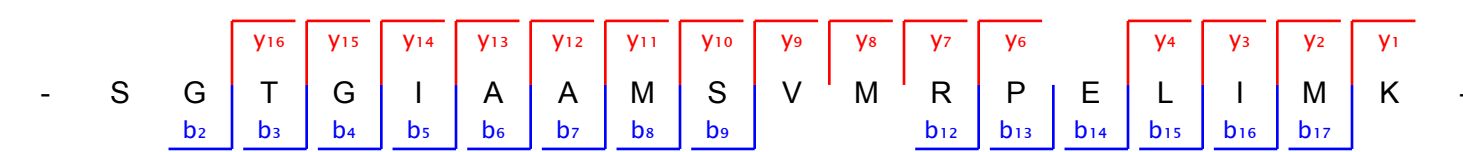

Raw file  
20130602\_EXQ4\_MaZe\_SA\_M1\_8

Scan 78671 Method FTMS; HCD Score 194.92 m/z 1019.55 Gene names Lsm5

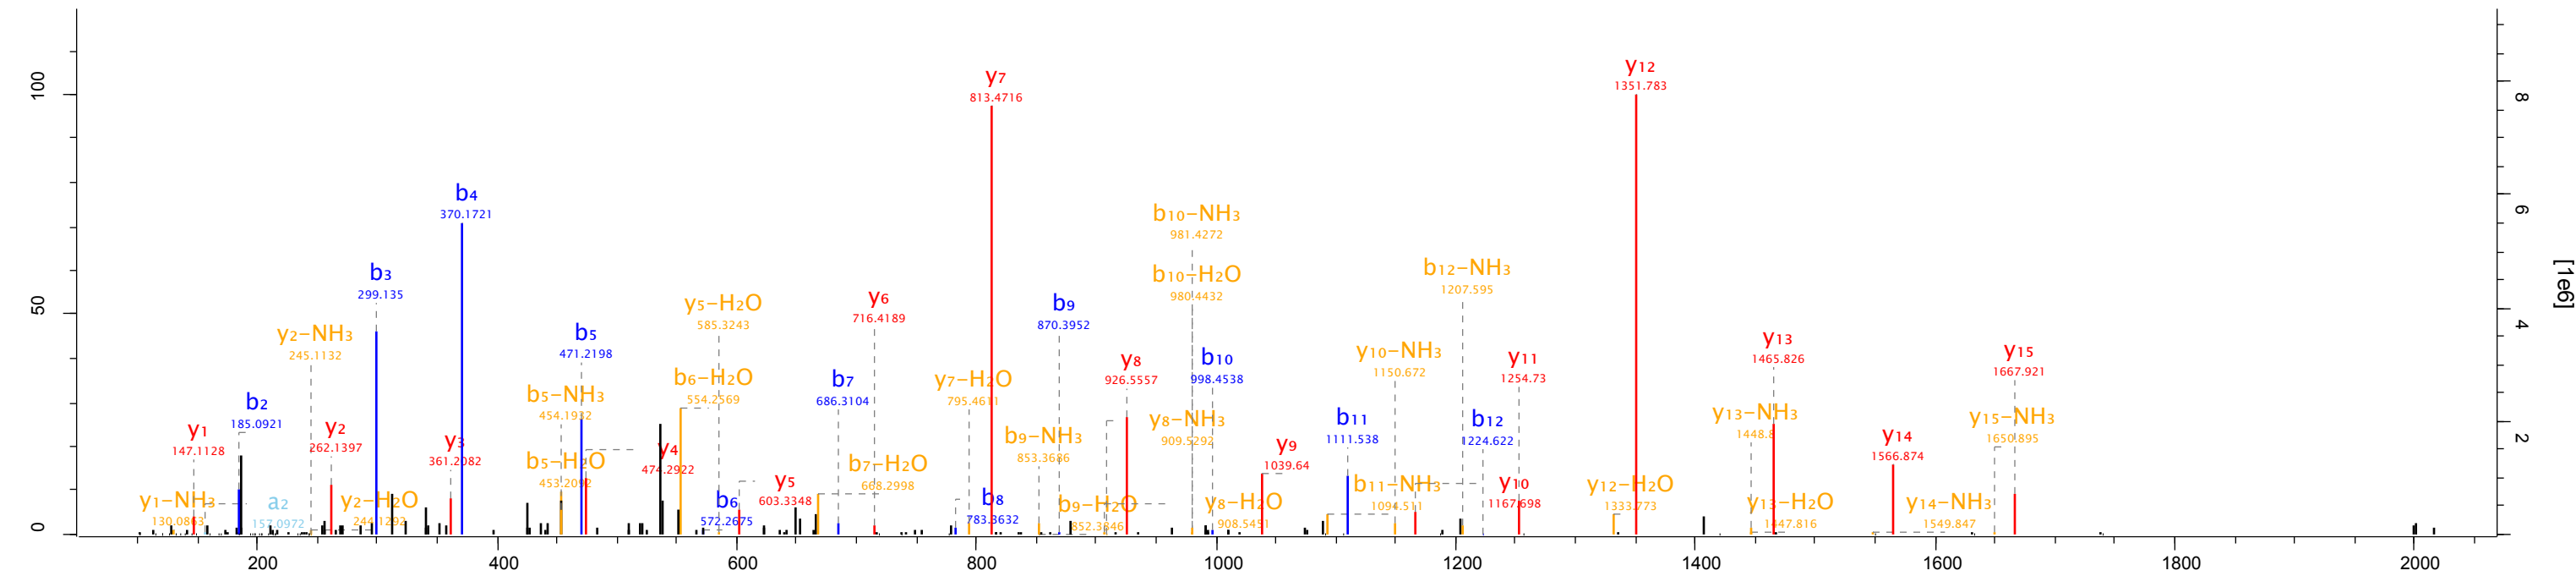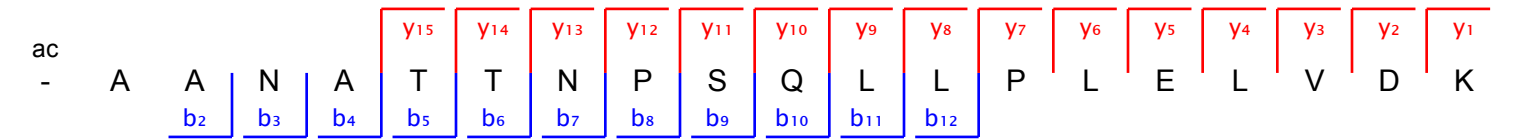

Raw file: 20130602\_EXQ4\_MaZe\_SA\_M1\_11  
 Scan: 12206 Method: FTMS; HCD Score: 164.93 m/z: 797.9 Gene names: mt-Co3;Mtco3

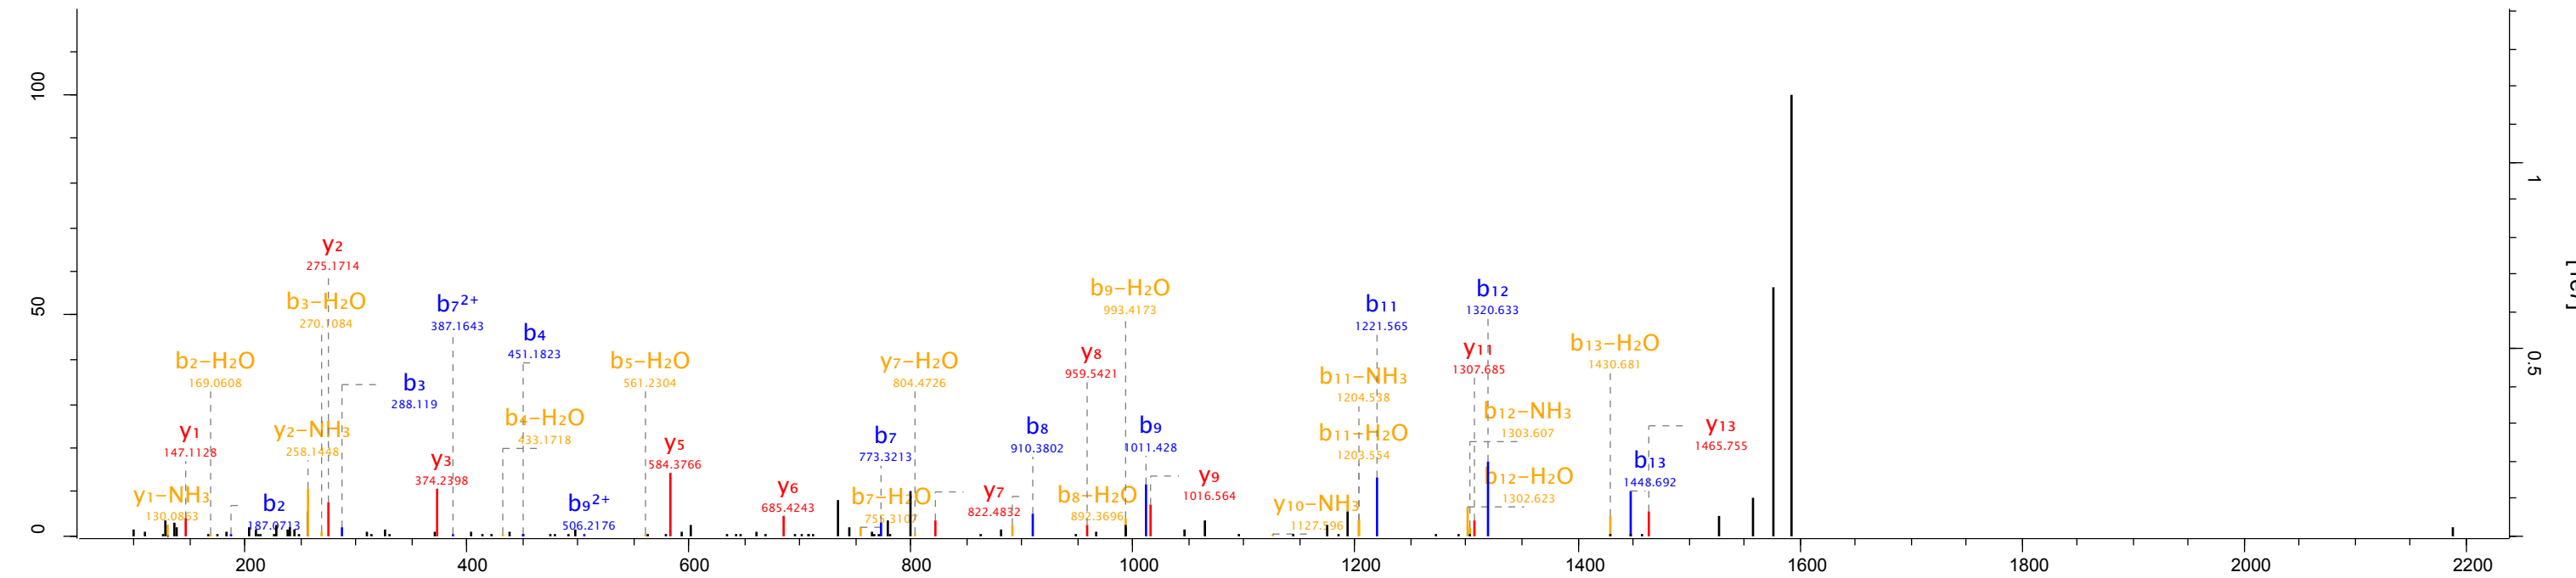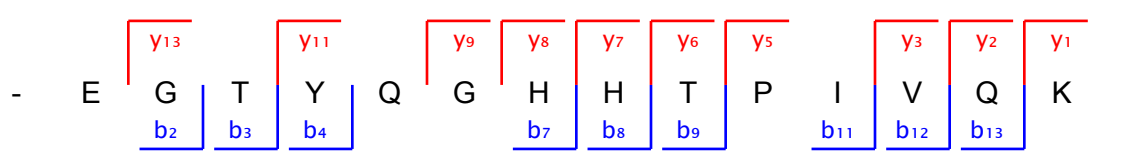

Raw file: 20130605\_EXQ4\_MaZe\_SA\_M3\_3  
 Scan: 40777 Method: FTMS; HCD Score: 66 m/z: 808.43 Gene names: Ttc22

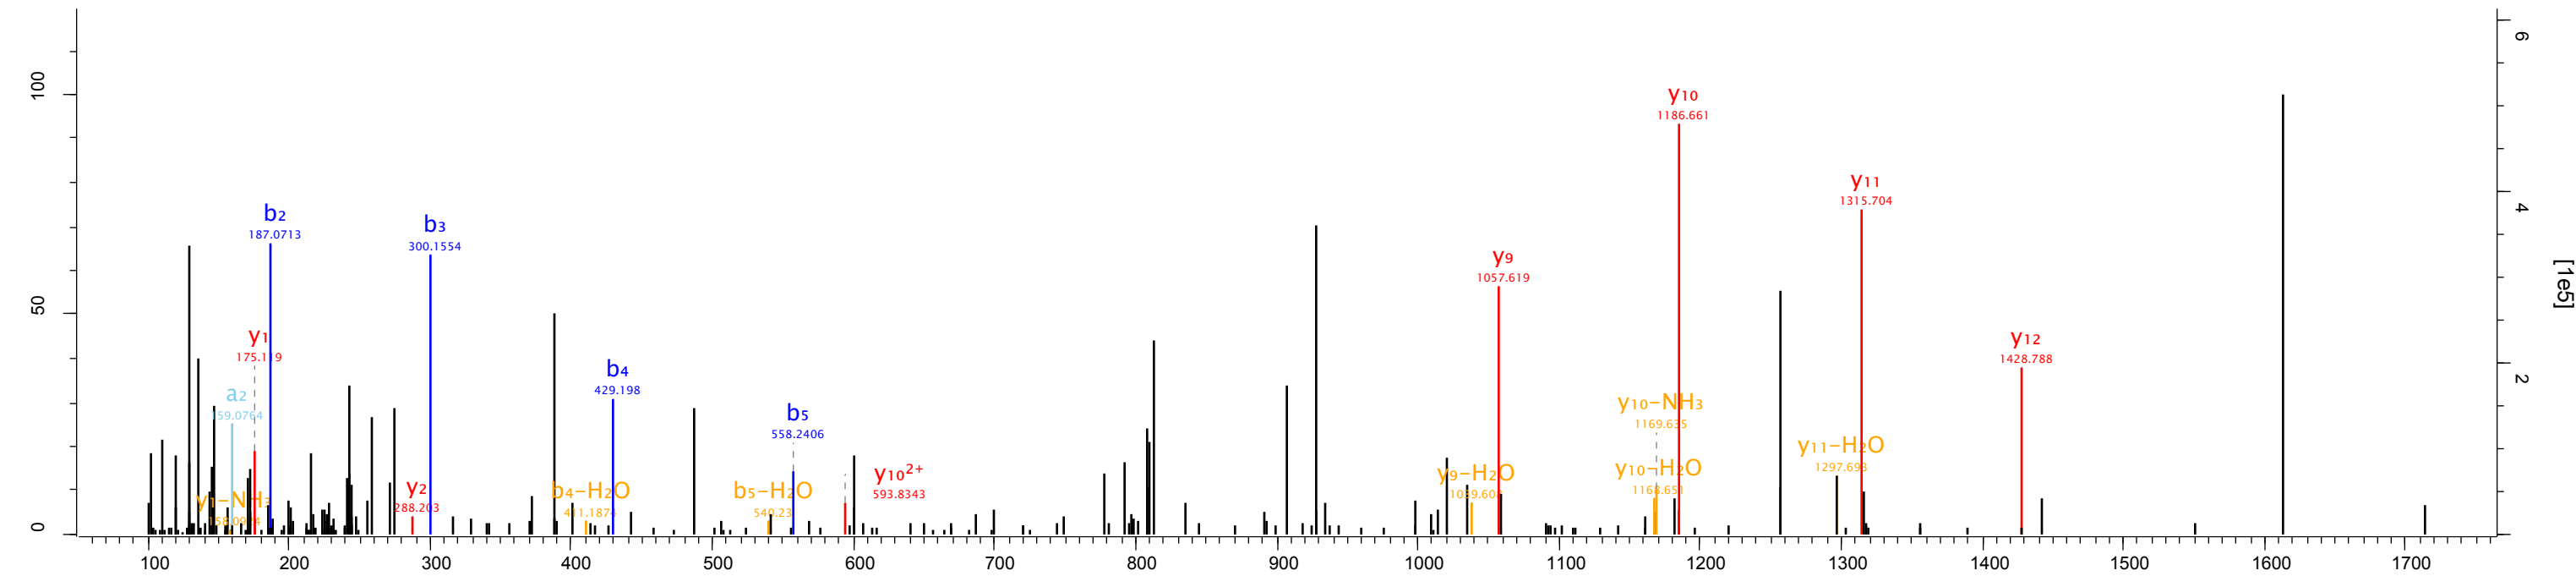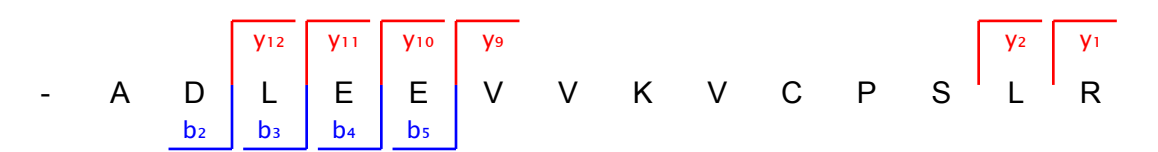

Raw file 20130605\_EXQ4\_MaZe\_SA\_M3\_8 Scan 63341 Method FTMS; HCD Score 59.34 m/z 1032.15 Gene names March8

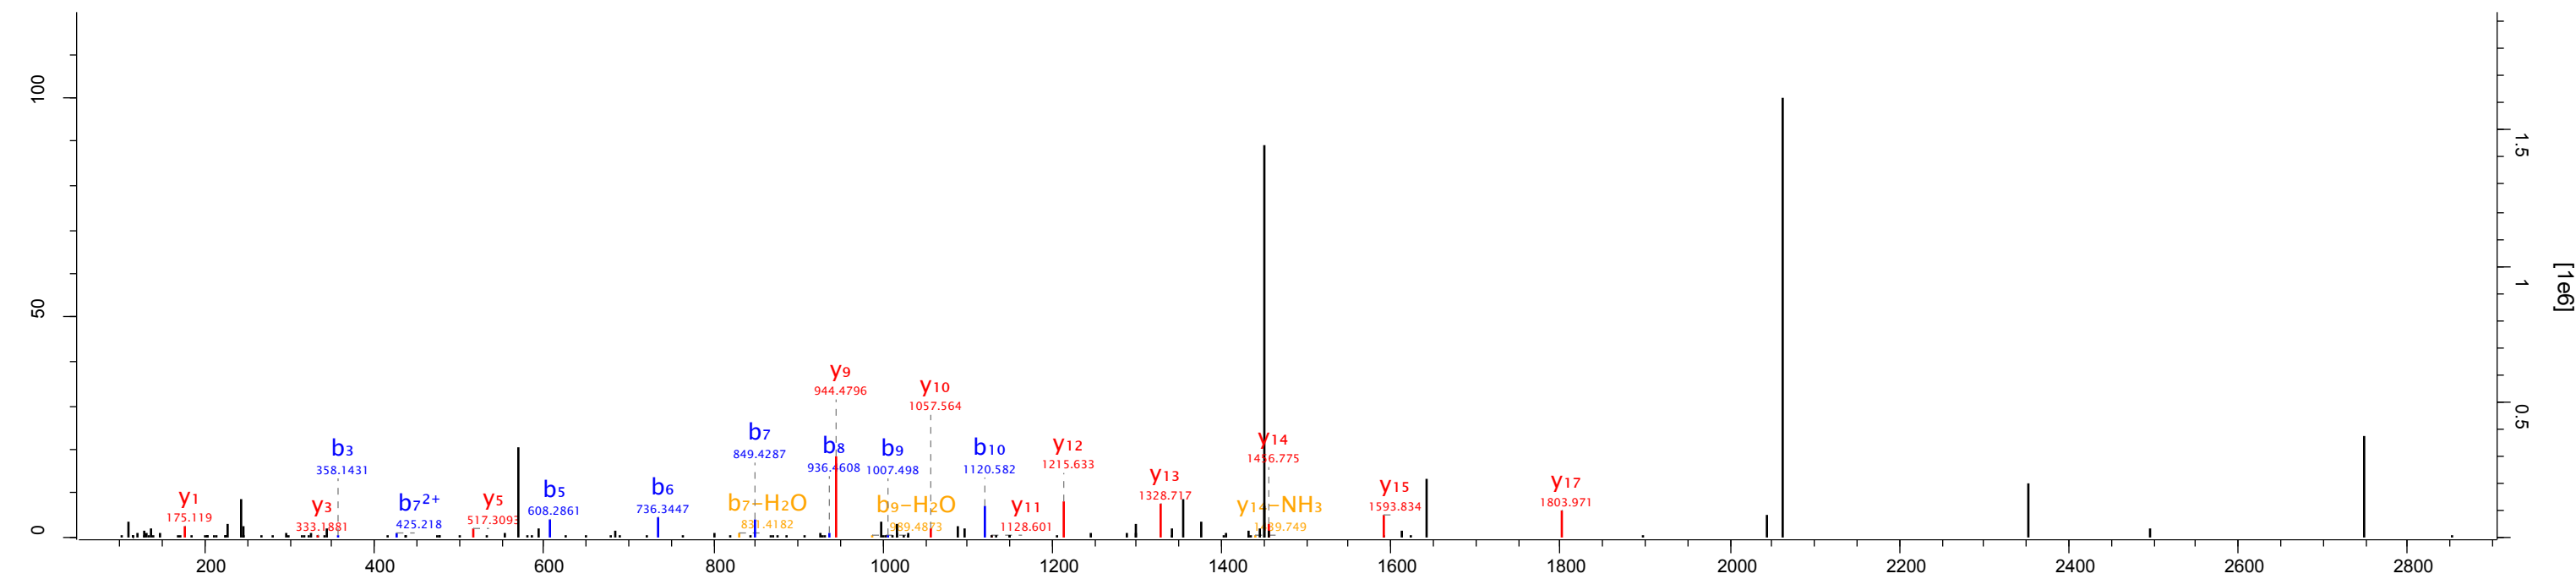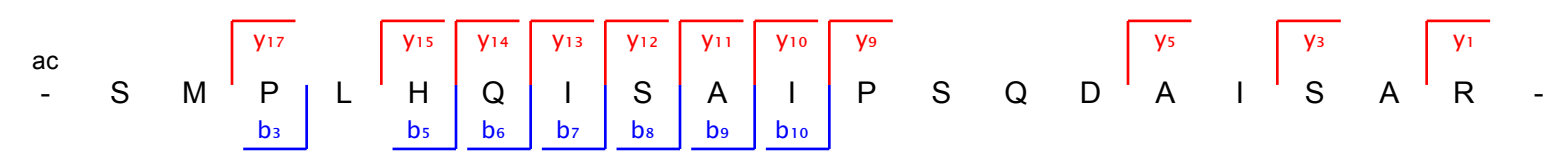

Raw file: 20130605\_EXQ4\_MaZe\_SA\_M3\_11  
 Scan: 4220 Method: FTMS; HCD Score: 41.4 m/z: 486.6 Gene names: Zswim4

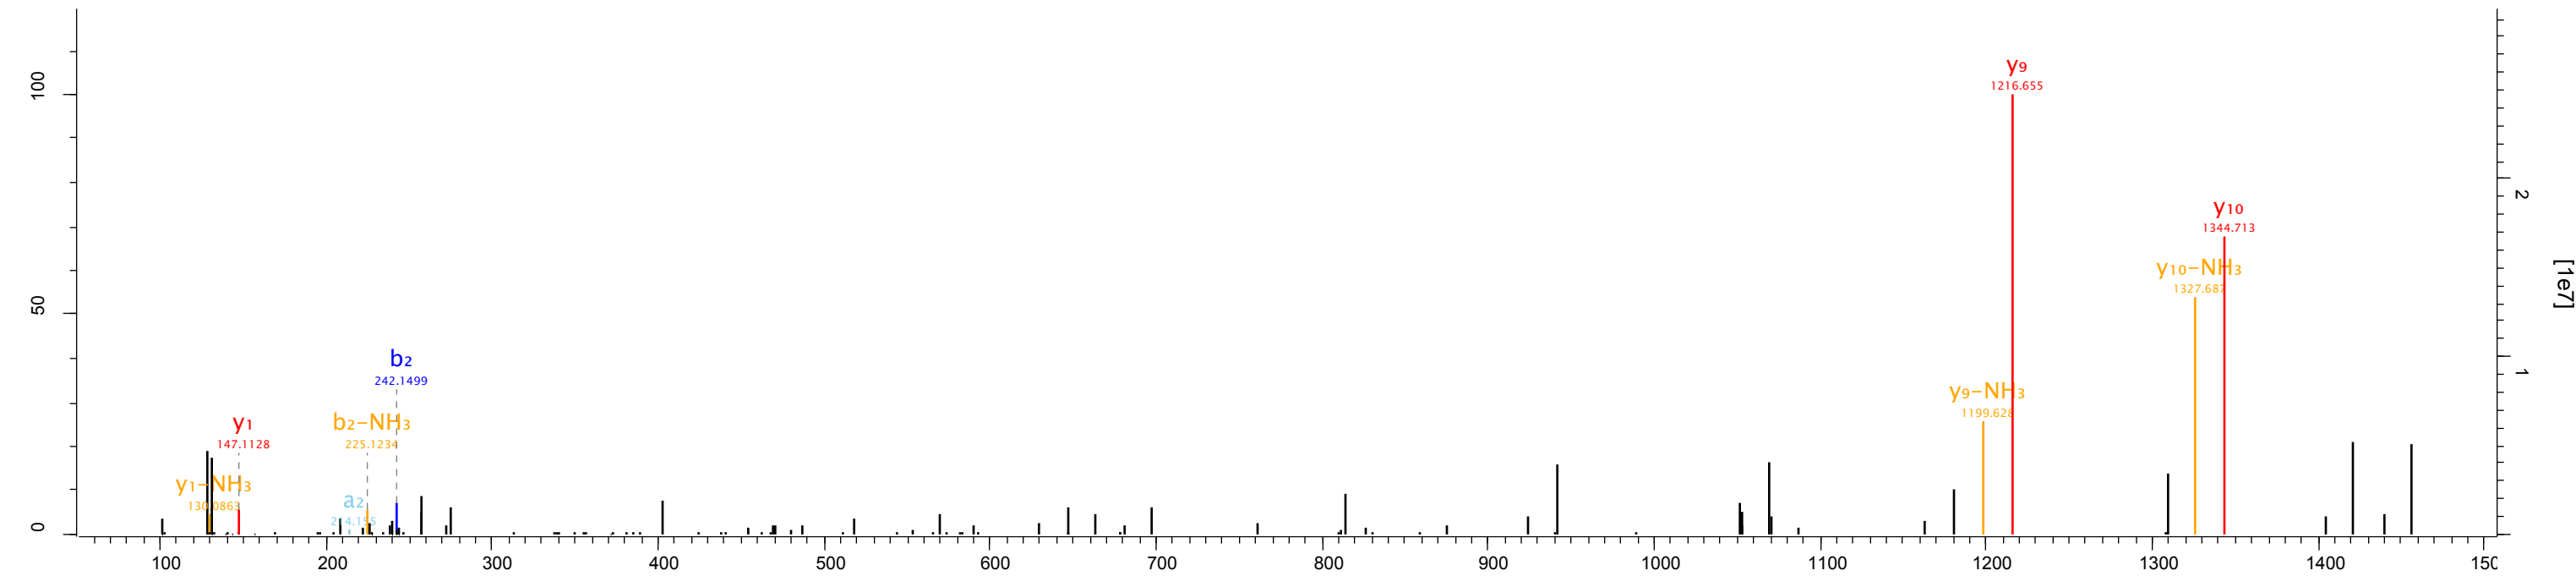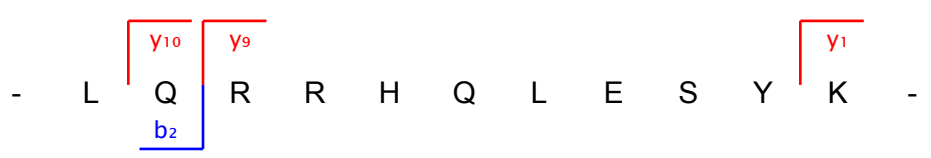

Raw file 20130605\_EXQ4\_MaZe\_SA\_M4\_5 Scan 50807 Method FTMS; HCD Score 127.3 m/z 881.5 Gene names Krtcap2

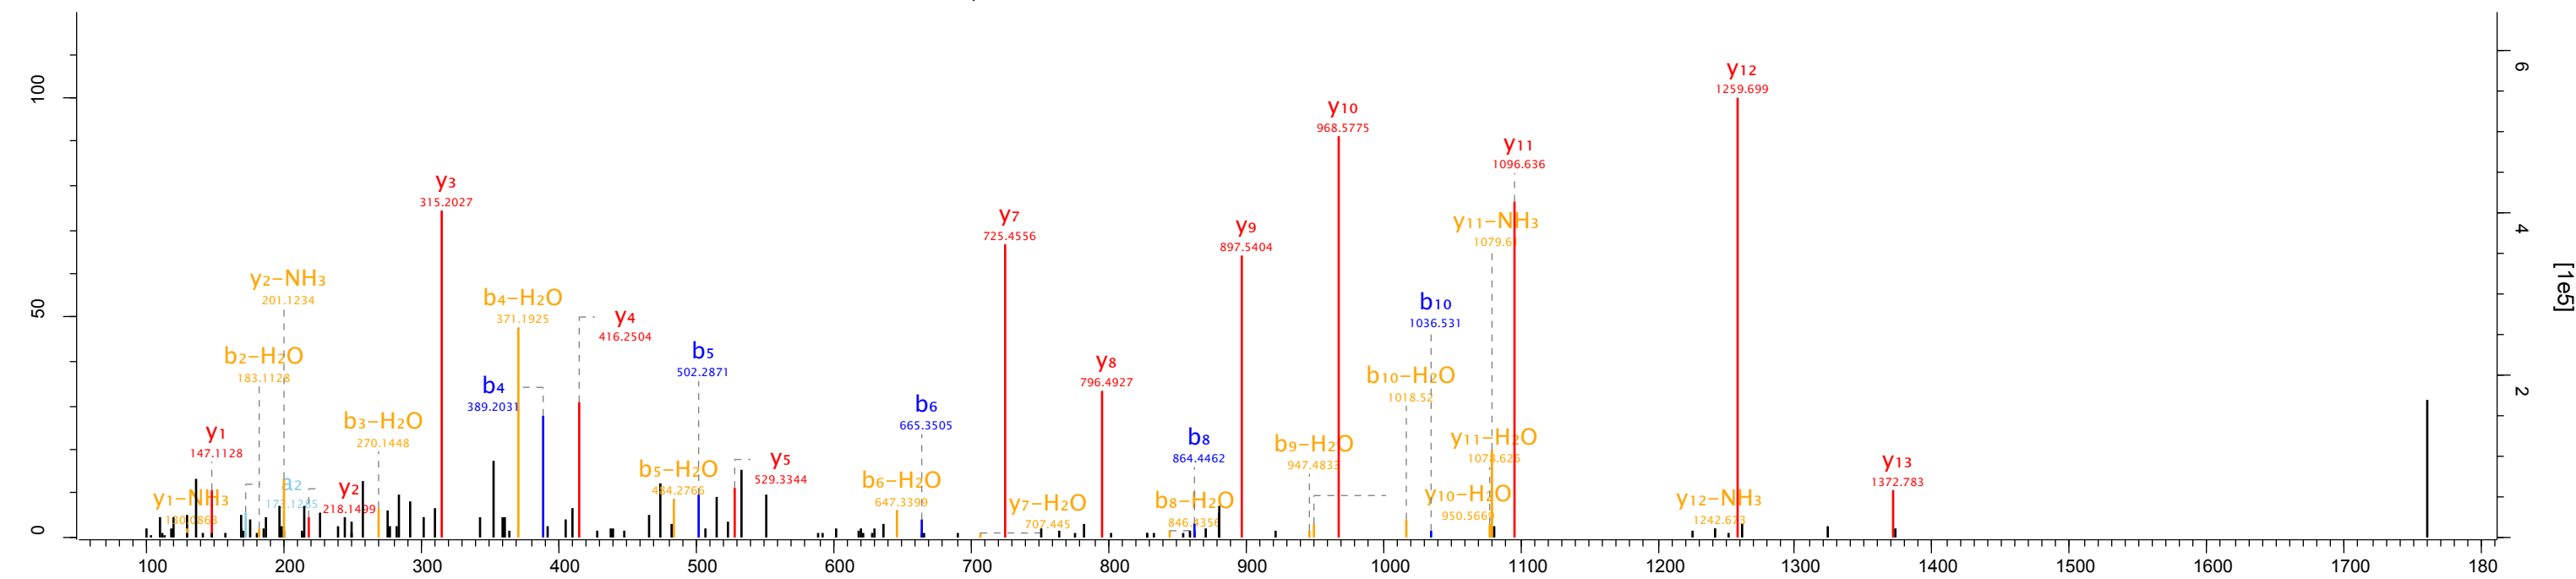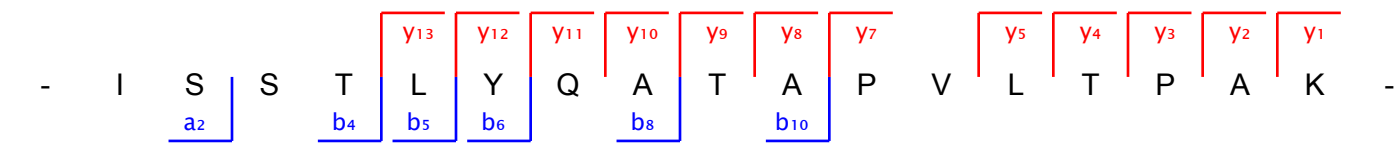



Raw file 20130605\_EXQ4\_MaZe\_SA\_M4\_11 Scan 8738 Method FTMS; HCD Score 84.74 m/z 463.26 Gene names Galnt10

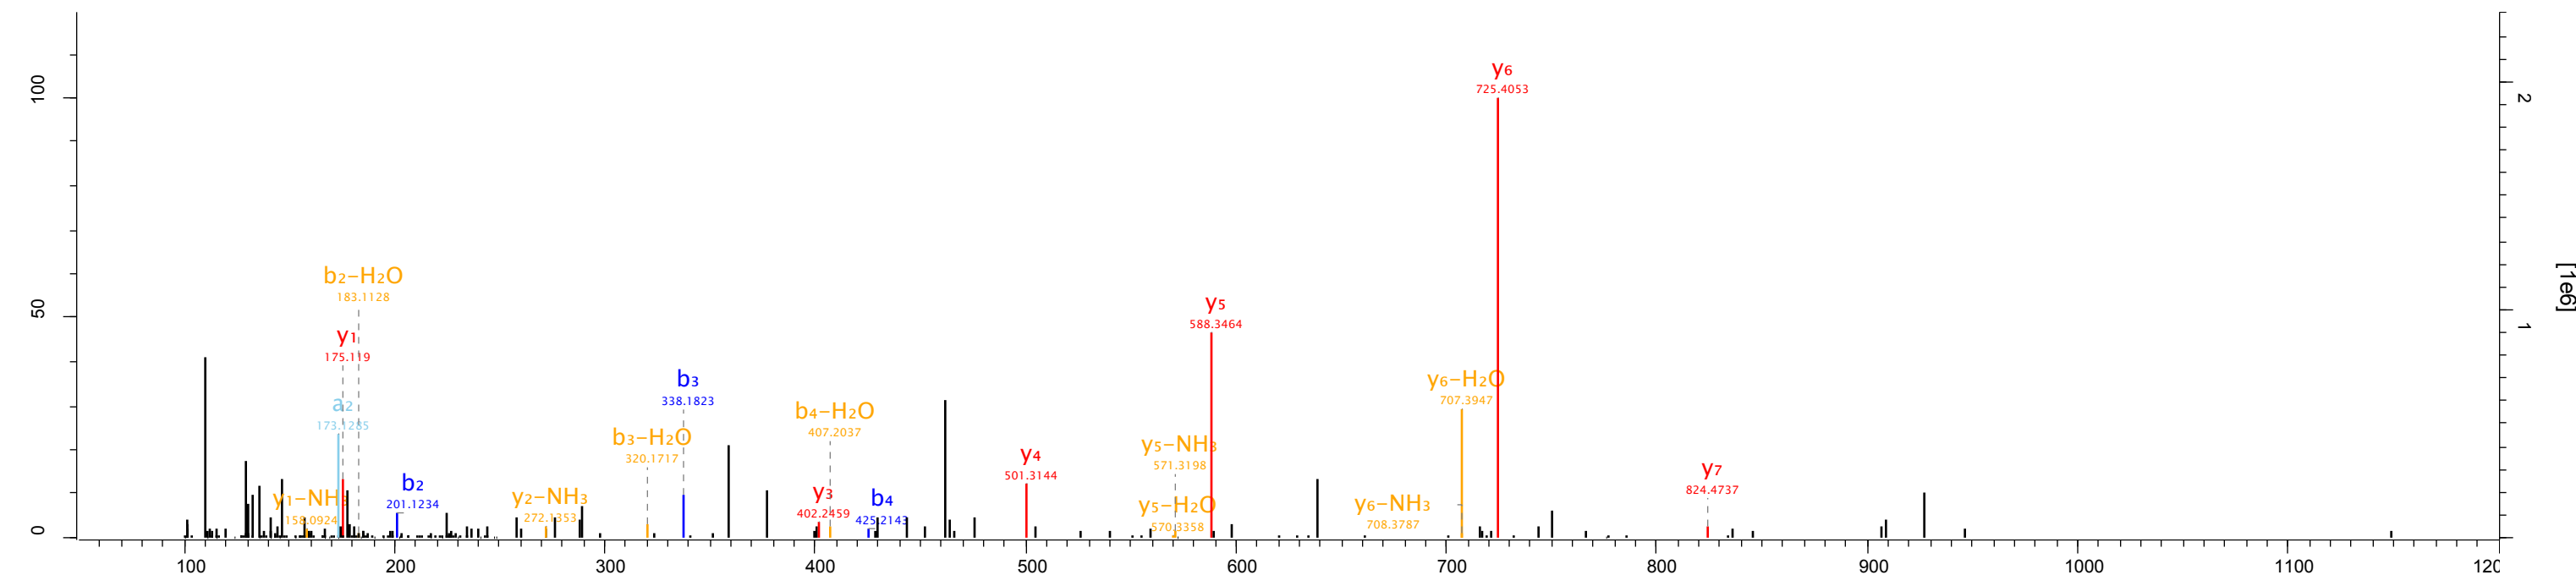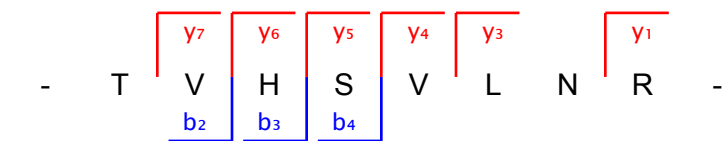

Raw file 20130628\_EXQ4\_MaZe\_SA\_P4\_11 Scan 34876 Method FTMS; HCD Score 132.32 m/z 702.86 Gene names Cyb561d2

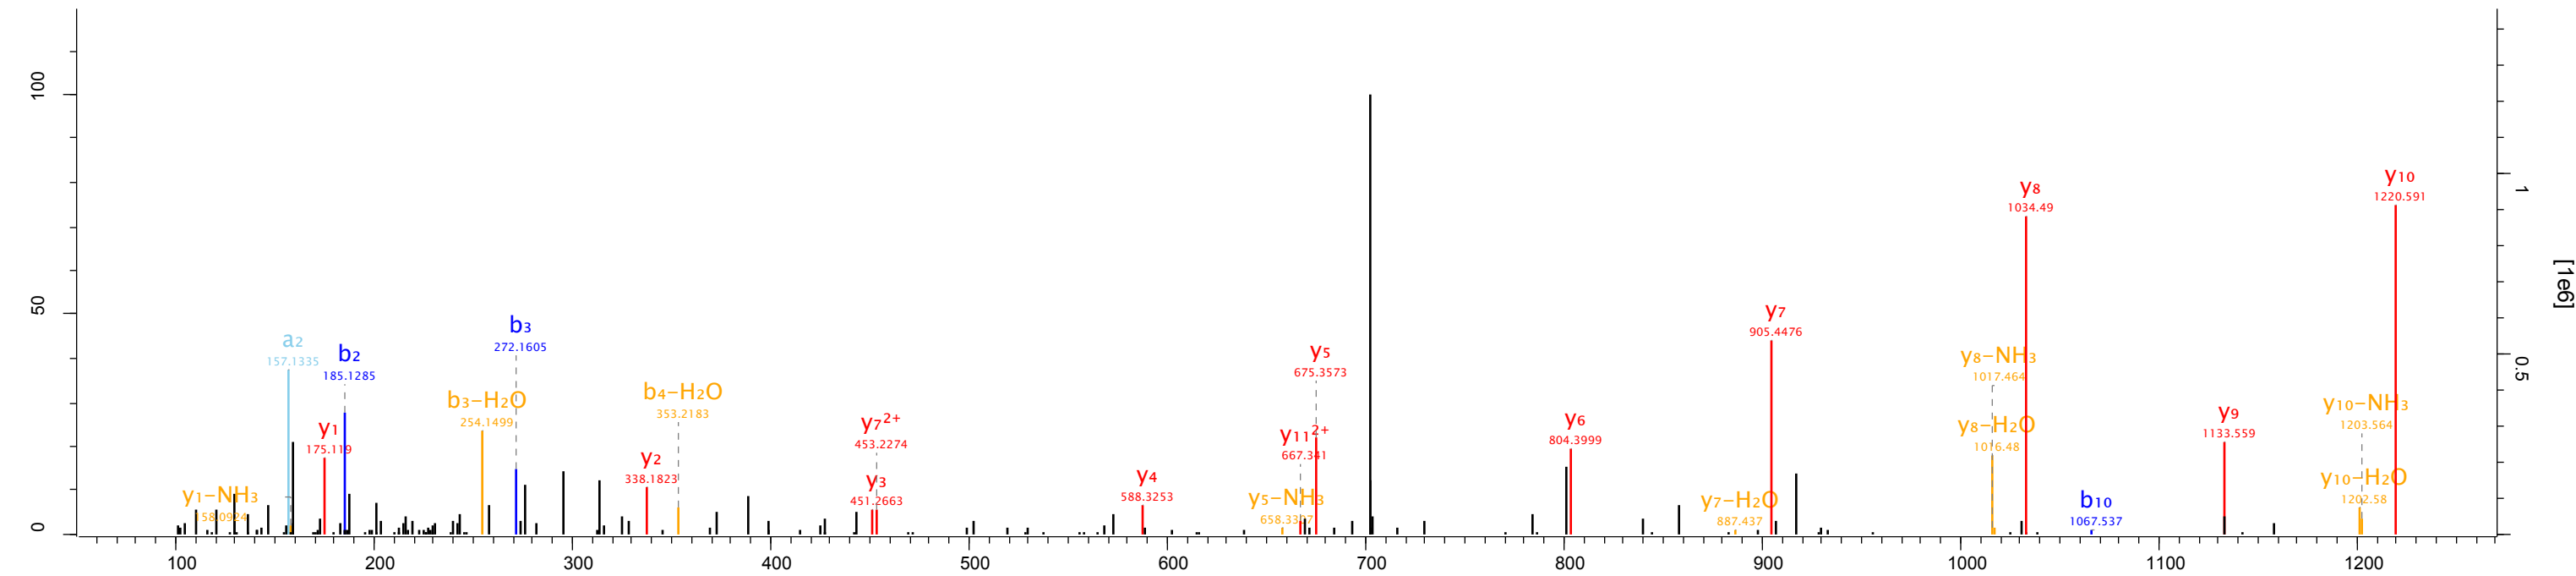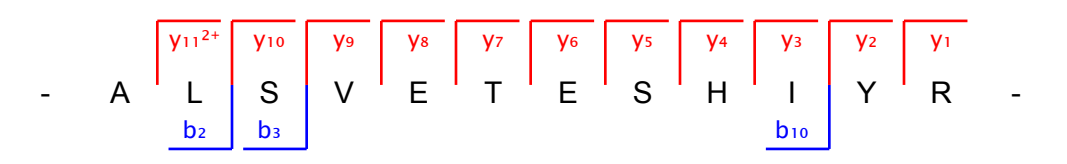

Raw file 20130628\_EXQ4\_MaZe\_SA\_P4\_11 Scan 37623 Method FTMS; HCD Score 123.75 m/z 403.88 Gene names Ndufb2

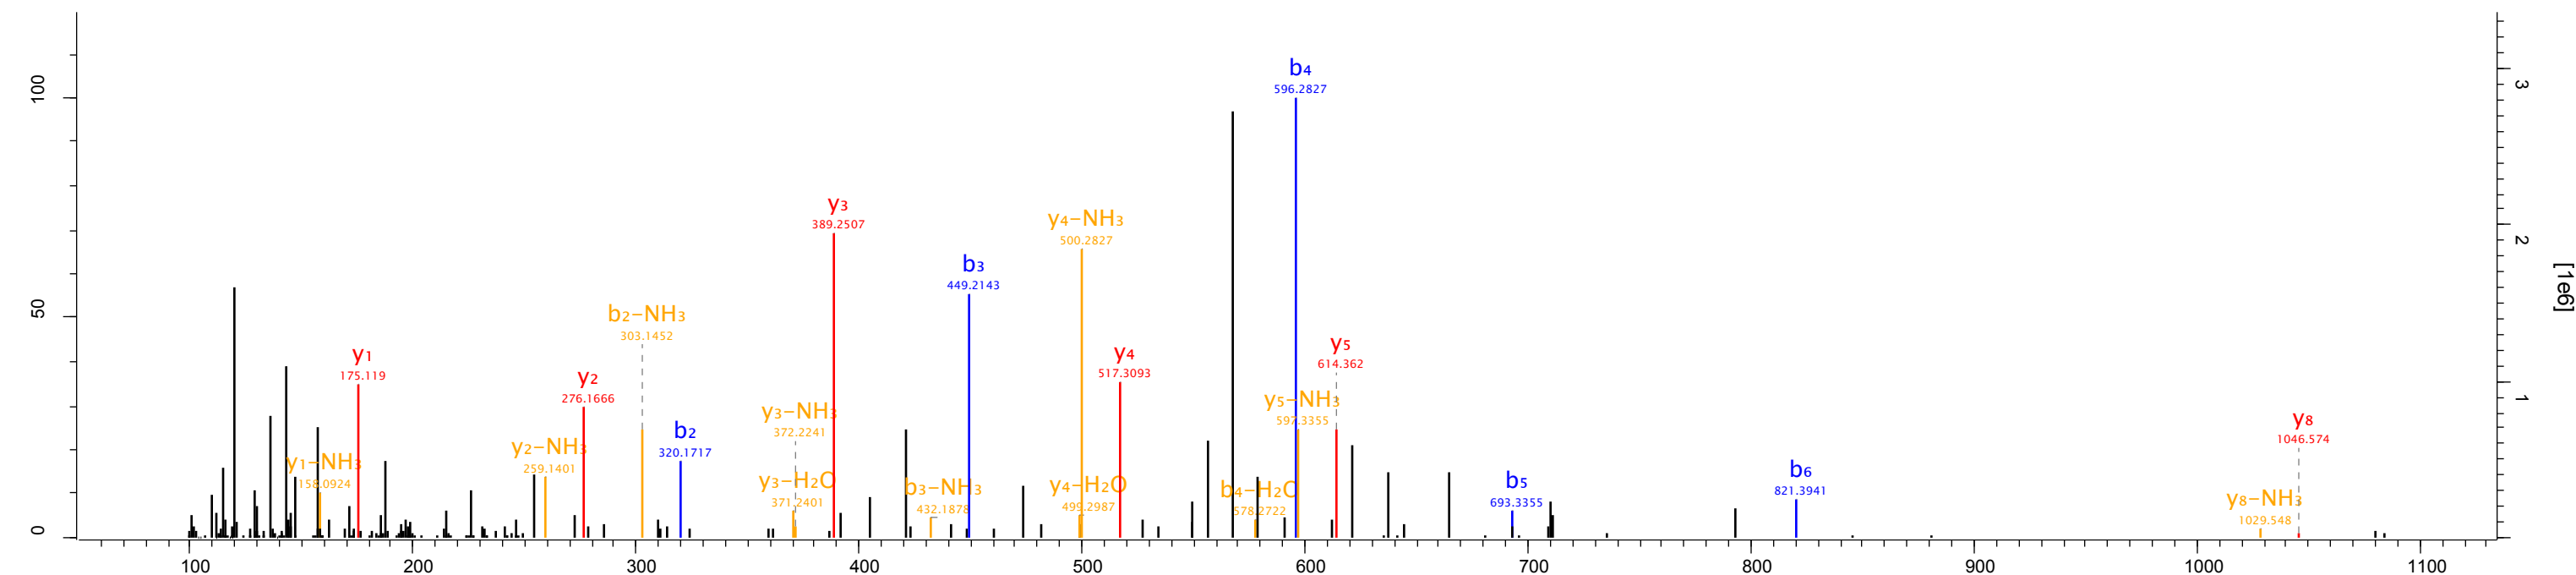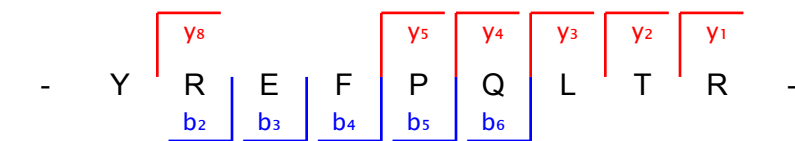

Supplement: supp_M114.038513_mcp.M114.038513-4.pdf [file supp_M114.038513_mcp.M114.038513-4.pdf]
